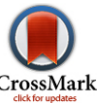

## Correction

# Correction: Urotensin II Induces Interleukin 8 Expression in Human Umbilical Vein Endothelial Cells

## The PLOS ONE Staff

Affiliation 1 is incorrect. Please refer to the correct affiliation 1 and associated authors here:

Chung-Yi Lee, Yi-Tin Tsai

Department of Cardiovascular Surgery, Tri-Service General Hospital, National Defense Medical Center, Taipei, Taiwan, Republic of China.

## Reference

1. Lee C-Y, Tsai Y-T, Loh S-H, Liu J-C, Chen T-H, et al. (2014) Urotensin II Induces Interleukin 8 Expression in Human Umbilical Vein Endothelial Cells. PLoS ONE 9(2): e90278. doi:10.1371/journal.pone.0090278

**Citation:** The PLOS ONE Staff (2014) Correction: Urotensin II Induces Interleukin 8 Expression in Human Umbilical Vein Endothelial Cells. PLoS ONE 9(8): e106275. doi:10.1371/journal.pone.0106275

**Published:** August 18, 2014

**Copyright:** © 2014 The PLOS ONE Staff. This is an open-access article distributed under the terms of the Creative Commons Attribution License, which permits unrestricted use, distribution, and reproduction in any medium, provided the original author and source are credited.
